# Supplementary material for: The addition of very light loads into the routine testing of the bench press increases the reliability of the force–velocity relationship
Source: PeerJ. 2018 Nov 8;6:e5835. doi: 10.7717/peerj.5835 (PMC6230439; doi:10.7717/peerj.5835)
Supplement: Supplemental Information 1 [file peerj-06-5835-s001.xlsm]

## Sheet: Session 1
Subject	Force_FREE_Load1	Velocity_FREE_Load1	Force_FREE_Load2	Velocity_FREE_Load2	Force_FREE_Load3	Velocity_FREE_Load3	Force_FREE_Load4	Velocity_FREE_Load4	Force_FREE_Load5	Velocity_FREE_Load5	Force_FREE_Load6	Velocity_FREE_Load6	Force_SMITH_Load3	Velocity_SMITH_Load3	Force_SMITH_Load4	Velocity_SMITH_Load4	Force_SMITH_Load5	Velocity_SMITH_Load5	Force_SMITH_Load6	Velocity_SMITH_Load6
1	119	2.44	300	1.782	511	1.161	590	0.957	664	0.768	679	0.556	514	1.263	606	1	671	0.797	734	0.641
2	113	2.262	234	1.579	410	0.843	418	0.763	446	0.657	472	0.58	444	0.908	473	0.904	484	0.703	515	0.647
3	114	2.134	272	1.821	534	1.307	620	1.036	700	0.777	760	0.523	532	1.316	649	1.107	730	0.85	808	0.59
4	136	2.255	326	2.006	509	1.279	592	1.07	595	0.904	670	0.894	542	1.325	619	1.21	688	0.982	746	0.801
5	122	2.488	295	1.935	535	1.291	647	0.979	765	0.692	837	0.48	526	1.228	656	1.018	629	0.946	772	0.711
6	108	2.027	248	1.65	432	0.892	457	0.764	478	0.656	590	0.402	452	0.969	472	0.842	503	0.75	543	0.586
7	103	1.981	226	1.414	398	0.674	414	0.686	430	0.585	448	0.511	414	0.657	427	0.59	438	0.511	449	0.413
8	126	1.787	271	1.593	462	0.967	631	0.617	631	0.617	699	0.46	499	1.188	582	0.854	682	0.711	744	0.541
9	107	1.908	240	1.51	401	0.712	421	0.51	423	0.534	448	0.374	432	0.863	439	0.796	468	0.771	484	0.645
10	97	1.927	243	1.591	424	0.864	445	0.785	494	0.69	507	0.588	466	1.081	480	0.905	524	0.785	546	0.732
11	121	2.423	299	1.954	535	1.315	603	0.949	696	0.803	778	0.549	548	1.431	644	1.116	717	0.855	798	0.605
12	112	2.326	289	1.882	505	1.215	606	0.999	708	0.78	794	0.581	532	1.394	615	1.052	721	0.875	817	0.622
13	125	2.252	313	1.726	523	1.027	646	0.799	772	0.634	847	0.477	559	1.215	664	0.893	766	0.644	865	0.448
14	118	2.65	298	2.009	540	1.266	614	1.023	715	0.776	799	0.568	515	1.394	619	1.034	725	0.814	810	0.571
15	149	2.682	343	1.963	579	1.302	680	0.872	849	0.752	957	0.443	569	1.516	767	1.072	872	0.785	994	0.518
16	102	2.328	248	1.81	432	0.969	530	0.821	587	0.535	666	0.323	467	1.141	532	0.803	611	0.559	683	0.38
17	137	2.37	308	1.955	519	1.253	616	1.04	724	0.852	834	0.637	549	1.279	645	1.012	749	0.841	831	0.608
18	105	2.42	234	1.671	434	0.932	485	0.849	546	0.619	589	0.476	470	1.037	493	0.897	564	0.6	610	0.494
19	112	2.383	275	1.809	504	1.189	592	0.893	687	0.624	774	0.45	519	1.33	596	1.011	711	0.706	807	0.496

## Sheet: Session 2
Subject	Force_FREE_Load1	Velocity_FREE_Load1	Force_FREE_Load2	Velocity_FREE_Load2	Force_FREE_Load3	Velocity_FREE_Load3	Force_FREE_Load4	Velocity_FREE_Load4	Force_FREE_Load5	Velocity_FREE_Load5	Force_FREE_Load6	Velocity_FREE_Load6	Force_SMITH_Load3	Velocity_SMITH_Load3	Force_SMITH_Load4	Velocity_SMITH_Load4	Force_SMITH_Load5	Velocity_SMITH_Load5	Force_SMITH_Load6	Velocity_SMITH_Load6
1	116	2.286	294	1.674	476	1.07	568	0.881	616	0.668	676	0.517	488	1.269	567	0.941	660	0.795	693	0.621
2	112	2.355	241	1.744	380	0.824	425	0.795	426	0.665	487	0.568	454	0.946	471	0.88	491	0.717	526	0.654
3	115	2.1	280	1.883	523	1.221	602	0.899	643	0.705	760	0.522	501	1.4	612	1.038	731	0.889	824	0.606
4	132	2.133	317	1.902	543	1.21	619	0.982	694	0.801	746	0.592	516	1.325	613	1.149	690	0.904	757	0.692
5	121	2.258	306	2.023	511	1.176	616	0.82	751	0.664	806	0.511	549	1.405	658	1.056	749	0.774	858	0.577
6	113	2.15	252	1.77	425	0.914	453	0.779	503	0.72	537	0.612	437	1.006	495	0.933	529	0.792	549	0.687
7	107	2.094	230	1.621	390	0.632	407	0.566	415	0.534	433	0.43	422	0.744	436	0.706	446	0.584	460	0.507
8	132	1.945	285	1.602	492	0.96	565	0.79	701	0.438	738	0.386	494	1.128	534	0.954	666	0.745	741	0.57
9	109	2.021	230	1.646	398	0.712	409	0.671	429	0.509	436	0.43	429	0.817	440	0.713	461	0.688	466	0.621
10	106	2.25	252	1.74	431	0.877	446	0.813	482	0.661	545	0.567	461	0.998	472	0.876	518	0.819	544	0.682
11	116	2.43	283	1.8	534	1.294	607	1.007	678	0.719	782	0.547	543	1.342	637	1.062	725	0.827	790	0.583
12	106	2.2	274	1.74	530	1.302	610	1.056	696	0.832	753	0.556	547	1.375	648	1.108	735	0.899	824	0.638
13	122	2.202	302	1.562	547	1.059	663	0.867	780	0.653	833	0.44	532	1.164	666	0.912	773	0.652	883	0.507
14	115	2.42	300	1.9	497	1.191	605	0.965	699	0.737	785	0.549	525	1.388	643	1.108	736	0.8	841	0.595
15	150	2.544	322	2.056	591	1.597	753	1.081	803	0.804	1006	0.52	599	1.388	751	1.108	864	0.8	993	0.595
16	103	2.412	259	1.816	455	1.07	523	0.784	608	0.543	666	0.35	457	1.398	544	0.985	627	0.747	715	0.518
17	140	2.44	311	2.055	524	1.273	619	1.111	743	0.854	830	0.639	549	1.093	638	0.855	763	0.629	874	0.448
18	101	2.213	233	1.59	412	0.856	461	0.76	542	0.584	606	0.397	455	1.298	498	1.083	563	0.885	612	0.694
19	112	2.415	282	1.859	504	1.201	610	0.924	687	0.71	778	0.517	525	1.026	600	0.818	709	0.618	771	0.446
